# Supplementary material for: The Preliminary Assessment of New Biomaterials Necessitates a Comparison of Direct and Indirect Cytotoxicity Methodological Approaches
Source: MDPI journal article supplement (doi:10.3390/polym14214522), 2022-10-25
Supplement: s1 [file polymers-1940529-supplementary.pdf › polymers-1940529-supplementary.pdf]

# Supplementary Materials: The Preliminary Assessment of New Biomaterials Necessitates a Comparison of Direct and Indirect Cytotoxicity Methodological Approaches

Milena Chraniuk, Mirosława Panasiuk, Lilit Hovhannisyan, Sabina Żołędowska, Dawid Nidzworski, Lidia Ciolek, Anna Woźniak, Zbigniew Jaegermann, Monika Biernat and Beata Gromadzka

**Table S1.** Results of statistical comparison between pores sizes.

| Comparison        | Difference statistically significant | <i>p</i> value |
|-------------------|--------------------------------------|----------------|
| CHBG2c vs. CHBG3c | No                                   | 0.0900         |
| CHBG2c vs. CHBG2a | No                                   | >0.9999        |
| CHBG2c vs. CHBG3a | Yes                                  | <0.0001        |
| CHBG2c vs. CHBG1  | No                                   | >0.9999        |
| CHBG2c vs. CHBG3b | Yes                                  | <0.0001        |
| CHBG2c vs. CHBG2b | No                                   | >0.9999        |
| CHBG3c vs. CHBG2a | No                                   | 0.4949         |
| CHBG3c vs. CHBG3a | No                                   | >0.9999        |
| CHBG3c vs. CHBG1  | No                                   | 0.8198         |
| CHBG3c vs. CHBG3b | No                                   | >0.9999        |
| CHBG3c vs. CHBG2b | No                                   | >0.9999        |
| CHBG2a vs. CHBG3a | Yes                                  | <0.0001        |
| CHBG2a vs. CHBG1  | No                                   | >0.9999        |
| CHBG2a vs. CHBG3b | Yes                                  | <0.0001        |
| CHBG2a vs. CHBG2b | No                                   | >0.9999        |
| CHBG3a vs. CHBG1  | Yes                                  | <0.0001        |
| CHBG3a vs. CHBG3b | No                                   | >0.9999        |
| CHBG3a vs. CHBG2b | Yes                                  | <0.0001        |
| CHBG1 vs. CHBG3b  | Yes                                  | <0.0001        |
| CHBG1 vs. CHBG2b  | No                                   | >0.9999        |
| CHBG3b vs. CHBG2b | Yes                                  | <0.0001        |

**Table S2.** Results of statistical comparison between proliferation in indirect method assessed with use of WST-1 assay.

| Comparison        | Difference statistically significant | <i>p</i> value |
|-------------------|--------------------------------------|----------------|
| CHBG2c vs. CHBG3c | Yes                                  | <0.0001        |
| CHBG2c vs. CHBG2a | Yes                                  | <0.0001        |
| CHBG2c vs. CHBG3a | Yes                                  | 0.0002         |
| CHBG2c vs. CHBG1  | No                                   | 0.1804         |
| CHBG2c vs. CHBG3b | Yes                                  | <0.0001        |
| CHBG2c vs. CHBG2b | No                                   | 0.1038         |
| CHBG3c vs. CHBG2a | Yes                                  | <0.0001        |
| CHBG3c vs. CHBG3a | Yes                                  | <0.0001        |
| CHBG3c vs. CHBG1  | Yes                                  | <0.0001        |
| CHBG3c vs. CHBG3b | Yes                                  | <0.0001        |
| CHBG3c vs. CHBG2b | Yes                                  | <0.0001        |
| CHBG2a vs. CHBG3a | No                                   | 0.0647         |
| CHBG2a vs. CHBG1  | Yes                                  | <0.0001        |
| CHBG2a vs. CHBG3b | Yes                                  | <0.0001        |
| CHBG2a vs. CHBG2b | Yes                                  | <0.0001        |

|                   |     |         |
|-------------------|-----|---------|
| CHBG3a vs. CHBG1  | Yes | 0.0001  |
| CHBG3a vs. CHBG3b | Yes | <0.0001 |
| CHBG3a vs. CHBG2b | Yes | 0.0001  |
| CHBG1 vs. CHBG3b  | Yes | <0.0001 |
| CHBG1 vs. CHBG2b  | No  | 0.1101  |
| CHBG3b vs. CHBG2b | Yes | <0.0001 |

**Table S3.** Results of statistical comparison between proliferation in direct method assessed with use of WST-1 assay.

| Comparison        | Difference statistically significant | <i>p</i> value |
|-------------------|--------------------------------------|----------------|
| CHBG2c vs. CHBG3c | No                                   | 0.3271         |
| CHBG2c vs. CHBG2a | No                                   | 0.1194         |
| CHBG2c vs. CHBG3a | No                                   | 0.2247         |
| CHBG2c vs. CHBG1  | Yes                                  | <0.0001        |
| CHBG2c vs. CHBG3b | Yes                                  | <0.0001        |
| CHBG2c vs. CHBG2b | Yes                                  | <0.0001        |
| CHBG3c vs. CHBG2a | No                                   | 0.2170         |
| CHBG3c vs. CHBG3a | No                                   | 0.3398         |
| CHBG3c vs. CHBG1  | Yes                                  | <0.0001        |
| CHBG3c vs. CHBG3b | Yes                                  | <0.0001        |
| CHBG3c vs. CHBG2b | Yes                                  | <0.0001        |
| CHBG2a vs. CHBG3a | No                                   | 0.2891         |
| CHBG2a vs. CHBG1  | Yes                                  | <0.0001        |
| CHBG2a vs. CHBG3b | Yes                                  | <0.0001        |
| CHBG2a vs. CHBG2b | Yes                                  | <0.0001        |
| CHBG3a vs. CHBG1  | Yes                                  | <0.0001        |
| CHBG3a vs. CHBG3b | Yes                                  | <0.0001        |
| CHBG3a vs. CHBG2b | Yes                                  | <0.0001        |
| CHBG1 vs. CHBG3b  | No                                   | 0.2170         |
| CHBG1 vs. CHBG2b  | No                                   | 0.4207         |
| CHBG3b vs. CHBG2b | No                                   | 0.2170         |

**Table S4.** Results of statistical comparison between effects measured in LDH assay for direct and indirect method.

| Composite | Difference statistically significant | <i>p</i> value |
|-----------|--------------------------------------|----------------|
| CHBG1     | Yes                                  | 0.0024         |
| CHBG2a    | No                                   | 0.2773         |
| CHBG2b    | Yes                                  | 0.0002         |
| CHBG2c    | Yes                                  | 0.0011         |
| CHBG3a    | Yes                                  | 0.0002         |
| CHBG3b    | Yes                                  | 0.0002         |
| CHBG3c    | No                                   | 0.2773         |

**Table S5.** Results of statistical comparison between cytotoxicity in indirect method assessed with use of LDH assay.

| Comparison        | Difference statistically significant | <i>p</i> value |
|-------------------|--------------------------------------|----------------|
| CHBG2c vs. CHBG3c | Yes                                  | <0.0001        |
| CHBG2c vs. CHBG2a | No                                   | 0.2884         |
| CHBG2c vs. CHBG3a | No                                   | 0.2871         |
| CHBG2c vs. CHBG1  | No                                   | 0.2105         |
| CHBG2c vs. CHBG2b | No                                   | 0.1119         |
| CHBG2c vs. CHBG3b | No                                   | 0.0867         |
| CHBG3c vs. CHBG2a | Yes                                  | <0.0001        |
| CHBG3c vs. CHBG3a | Yes                                  | <0.0001        |

|                   |     |         |
|-------------------|-----|---------|
| CHBG3c vs. CHBG1  | Yes | <0.0001 |
| CHBG3c vs. CHBG2b | Yes | <0.0001 |
| CHBG3c vs. CHBG3b | Yes | <0.0001 |
| CHBG2a vs. CHBG3a | No  | 0.0658  |
| CHBG2a vs. CHBG1  | No  | 0.4519  |
| CHBG2a vs. CHBG2b | No  | 0.2884  |
| CHBG2a vs. CHBG3b | No  | 0.2715  |
| CHBG3a vs. CHBG1  | No  | 0.0502  |
| CHBG3a vs. CHBG2b | Yes | 0.0212  |
| CHBG3a vs. CHBG3b | Yes | 0.0154  |
| CHBG1 vs. CHBG2b  | No  | 0.5023  |
| CHBG1 vs. CHBG3b  | No  | 0.4519  |
| CHBG2b vs. CHBG3b | No  | 0.5745  |

**Table S6.** Results of statistical comparison between cytotoxicity in direct method assessed with use of LDH assay.

| Comparison        | Difference statistically significant | <i>p</i> value |
|-------------------|--------------------------------------|----------------|
| CHBG2c vs. CHBG3c | Yes                                  | 0.0005         |
| CHBG2c vs. CHBG2a | Yes                                  | 0.0003         |
| CHBG2c vs. CHBG3a | Yes                                  | 0.0402         |
| CHBG2c vs. CHBG1  | Yes                                  | <0.0001        |
| CHBG2c vs. CHBG2b | Yes                                  | <0.0001        |
| CHBG2c vs. CHBG3b | Yes                                  | <0.0001        |
| CHBG3c vs. CHBG2a | Yes                                  | <0.0001        |
| CHBG3c vs. CHBG3a | Yes                                  | 0.0094         |
| CHBG3c vs. CHBG1  | Yes                                  | 0.0044         |
| CHBG3c vs. CHBG2b | Yes                                  | <0.0001        |
| CHBG3c vs. CHBG3b | Yes                                  | <0.0001        |
| CHBG2a vs. CHBG3a | Yes                                  | <0.0001        |
| CHBG2a vs. CHBG1  | Yes                                  | <0.0001        |
| CHBG2a vs. CHBG2b | Yes                                  | <0.0001        |
| CHBG2a vs. CHBG3b | Yes                                  | <0.0001        |
| CHBG3a vs. CHBG1  | Yes                                  | <0.0001        |
| CHBG3a vs. CHBG2b | Yes                                  | <0.0001        |
| CHBG3a vs. CHBG3b | Yes                                  | <0.0001        |
| CHBG1 vs. CHBG2b  | Yes                                  | <0.0001        |
| CHBG1 vs. CHBG3b  | Yes                                  | <0.0001        |
| CHBG2b vs. CHBG3b | Yes                                  | 0.0448         |
